# Supplementary material for: Technical note: Improved calculation of volume, F T correction, and other derived data for polished zircon (U-Th)/He thermochronology
Source: Copernicus journal article supplement (doi:10.5194/gchron-7-571-2025), 2025-11-03
Supplement: Supplementary file [file gchron-7-571-2025-supplement-title-page.pdf › gchron-7-571-2025-supplement-title-page.pdf]

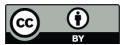

## *Supplement of*

# **Technical note: Improved calculation of volume, $F_T$ correction, and other derived data for polished zircon (U-Th)/He thermochronology**

**Barra A. Peak**

*Correspondence to:* Barra A. Peak ([barra.peak@jsg.utexas.edu](mailto:barra.peak@jsg.utexas.edu))

- [gchron-7-571-2025-supplement-title-page.pdf](#)
- [GChron\\_Supplement\\_Text.pdf](#)
- [GChron\\_Supplement\\_tables.xlsx](#)

The copyright of individual parts of the supplement might differ from the article licence.
